# Supplementary material for: Nematode and Arthropod Genomes Provide New Insights into the Evolution of Class 2 B1 GPCRs
Source: PLOS journal article supplement (doi:10.1371/journal.pone.0092220), 2014-03-20
Supplement: S11 (10.1371/journal.pone.0092220.s011) [file journal.pone.0092220.s011]

**Table S6**

|                                      | <i>C. elegans</i> |              |              | <i>T. castaneum</i> |             |             |             |             |             |             |             |  |
|--------------------------------------|-------------------|--------------|--------------|---------------------|-------------|-------------|-------------|-------------|-------------|-------------|-------------|--|
| <i>Homo sapiens</i>                  | <i>PDF-R</i>      | <i>Seb-2</i> | <i>Seb-3</i> | <i>Tca1</i>         | <i>Tca2</i> | <i>Tca3</i> | <i>Tca4</i> | <i>Tca5</i> | <i>Tca6</i> | <i>Tca8</i> | <i>Tca9</i> |  |
| <i>Calcitonin subfamily</i>          |                   |              |              |                     |             |             |             |             |             |             |             |  |
| CALCR                                | 62%               | 55%          | 56%          | 60%                 | 60%         | 65%         | 72%         | 57%         | 44%         | 59%         | 63%         |  |
| CALCRL                               | 59%               | 50%          | 55%          | 60%                 | 60%         | 66%         | 72%         | 52%         | 44%         | 58%         | 61%         |  |
| <i>Corticotropin subfamily</i>       |                   |              |              |                     |             |             |             |             |             |             |             |  |
| CRHR1                                | 54%               | 50%          | 61%          | 64%                 | 61%         | 60%         | 61%         | 51%         | 42%         | 65%         | 66%         |  |
| <i>Parathyroid subfamily</i>         |                   |              |              |                     |             |             |             |             |             |             |             |  |
| PTH1R                                | 58%               | 52%          | 55%          | 60%                 | 60%         | 63%         | 63%         | 55%         | 42%         | 62%         | 69%         |  |
| <i>Glucagon subfamily</i>            |                   |              |              |                     |             |             |             |             |             |             |             |  |
| GCGR                                 | 55%               | 53%          | 58%          | 59%                 | 58%         | 62%         | 66%         | 51%         | 43%         | 65%         | 67%         |  |
| GIPR                                 | 53%               | 54%          | 53%          | 59%                 | 57%         | 61%         | 64%         | 53%         | 39%         | 64%         | 68%         |  |
| <i>Secretin subfamily</i>            |                   |              |              |                     |             |             |             |             |             |             |             |  |
| VIPR1                                | 57%               | 50%          | 59%          | 60%                 | 60%         | 62%         | 65%         | 54%         | 42%         | 62%         | 65%         |  |
| ADCYAP1R1                            | 53%               | 50%          | 59%          | 62%                 | 60%         | 59%         | 65%         | 52%         | 41%         | 65%         | 64%         |  |
| <i>Strongylocentrotus purpuratus</i> |                   |              |              |                     |             |             |             |             |             |             |             |  |
| PDF-R-like                           | 60%               | 48%          | 54%          | 56%                 | 50%         | 57%         | 58%         | 60%         | 46%         | 57%         | 60%         |  |
